# Supplementary material for: Validated assays for the quantification of C9orf72 human pathology
Source: PubMed Central journal article supplement (PMC10774390; doi:10.1038/s41598-023-50667-3), 2024-01-08
Supplement: 41598_2023_50667_MOESM1_ESM.pdf [file 41598_2023_50667_MOESM1_ESM.pdf]

## Supplementary Figures and Tables

### Validated assays for the quantification of C9orf72 human pathology

Salomonsson SE<sup>\*1,2</sup>, Maltos AM<sup>\*3</sup>, Gill K<sup>1,2,3</sup>, Aladesuyi Arogundade O<sup>1,2</sup>, Brown KA<sup>1,2</sup>, Sachdev A<sup>3</sup>, Scaff M<sup>1,2,3</sup>, Lam KJK<sup>1,2</sup>, Fisher IJ<sup>1,2</sup>, Chouhan RS<sup>1,2</sup>, Van Laar VS<sup>4,5</sup>, Marley CB<sup>1</sup>, McLaughlin I<sup>6</sup>, Bankiewicz KS<sup>4,5</sup>, Tsai Y-C<sup>6</sup>, Conklin BR<sup>3,7</sup>, Clelland CD<sup>#1,2</sup>.

<sup>1</sup>Weill Institute for Neurosciences, University of California San Francisco, San Francisco, California, USA

<sup>2</sup>Memory & Aging Center, Department of Neurology, University of California San Francisco, San Francisco, California, USA

<sup>3</sup>Gladstone Institutes, San Francisco, California, USA

<sup>4</sup>Department of Neurological Surgery, The Ohio State University, Columbus, Ohio, USA

<sup>5</sup>The Gene Therapy Institute, The Ohio State University, Columbus, Ohio, USA

<sup>6</sup>Pacific Biosciences, Menlo Park, California, USA

<sup>7</sup>Departments of Medicine, Ophthalmology, and Pharmacology, University of California San Francisco, San Francisco, California, USA.

\*These authors contributed equally

#Correspondance: Claire D. Clelland: [claire.clelland@ucsf.edu](mailto:claire.clelland@ucsf.edu)

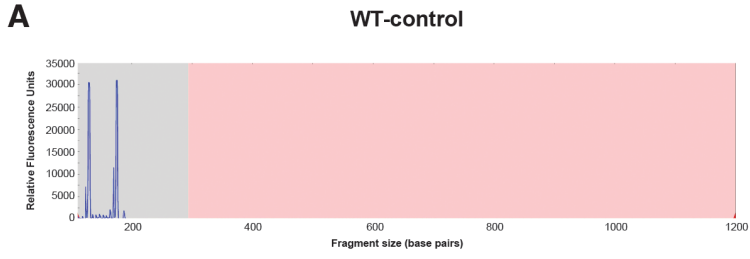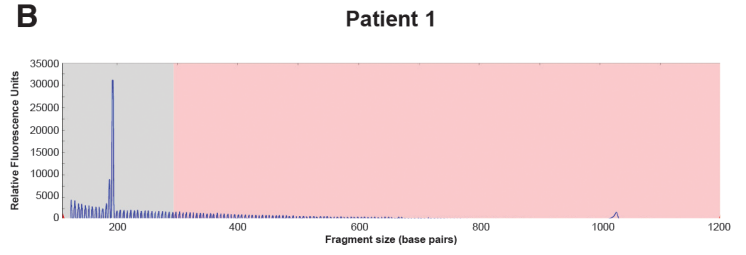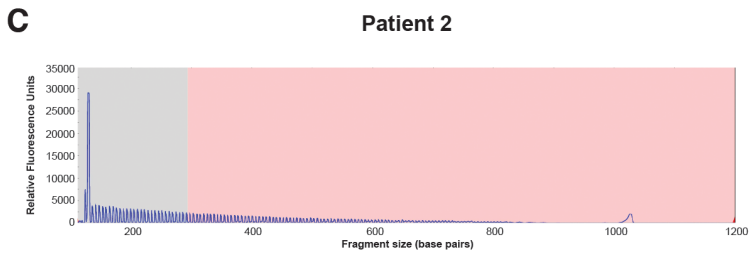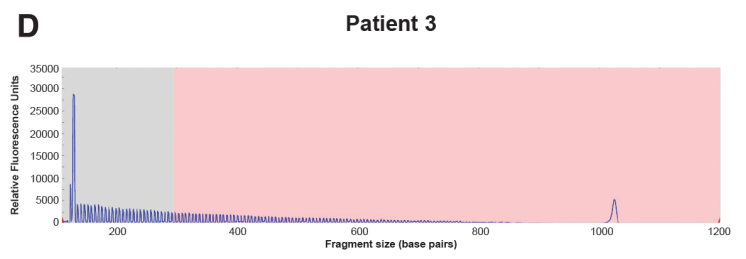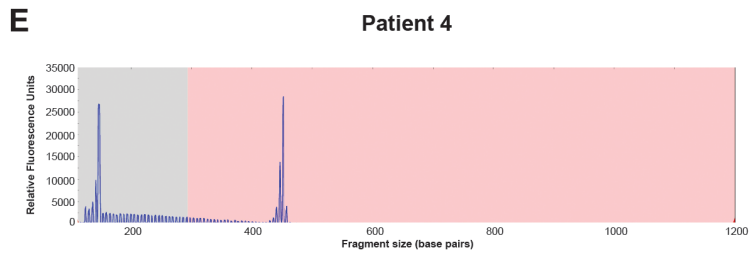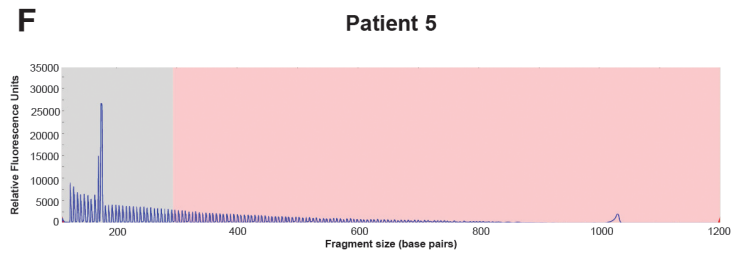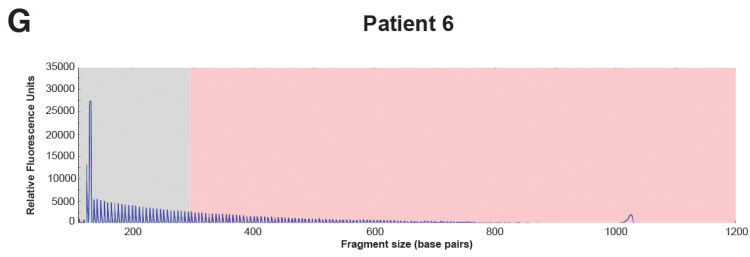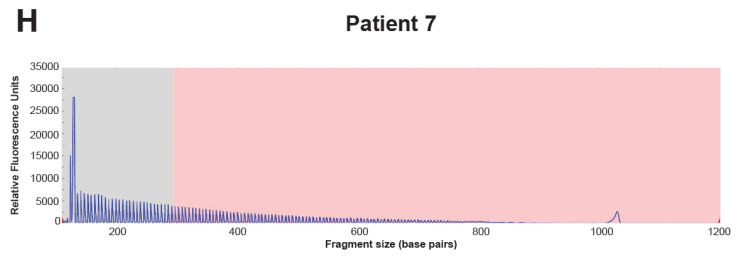



**Supplemental Figure 1. Electropherograms for each patient line produced by GS/RP-PCR and capillary electrophoresis. (A-H)** Gene specific, repeat primed PCR detects *C9orf72* repeats up to 145. Each patient has one non-expanded allele (left blue peak in the grey region). Expanded repeats less than 145 (*e.g.*, Patient 4, right blue peak) are accurately sized, but there is no quantification of repeats greater than 145 (lack of equivalent second blue peak for every other patient). Instead, the expanded allele is detected but not sized by the presence of the small peak around position 1000 (~140 repeats, pink region).

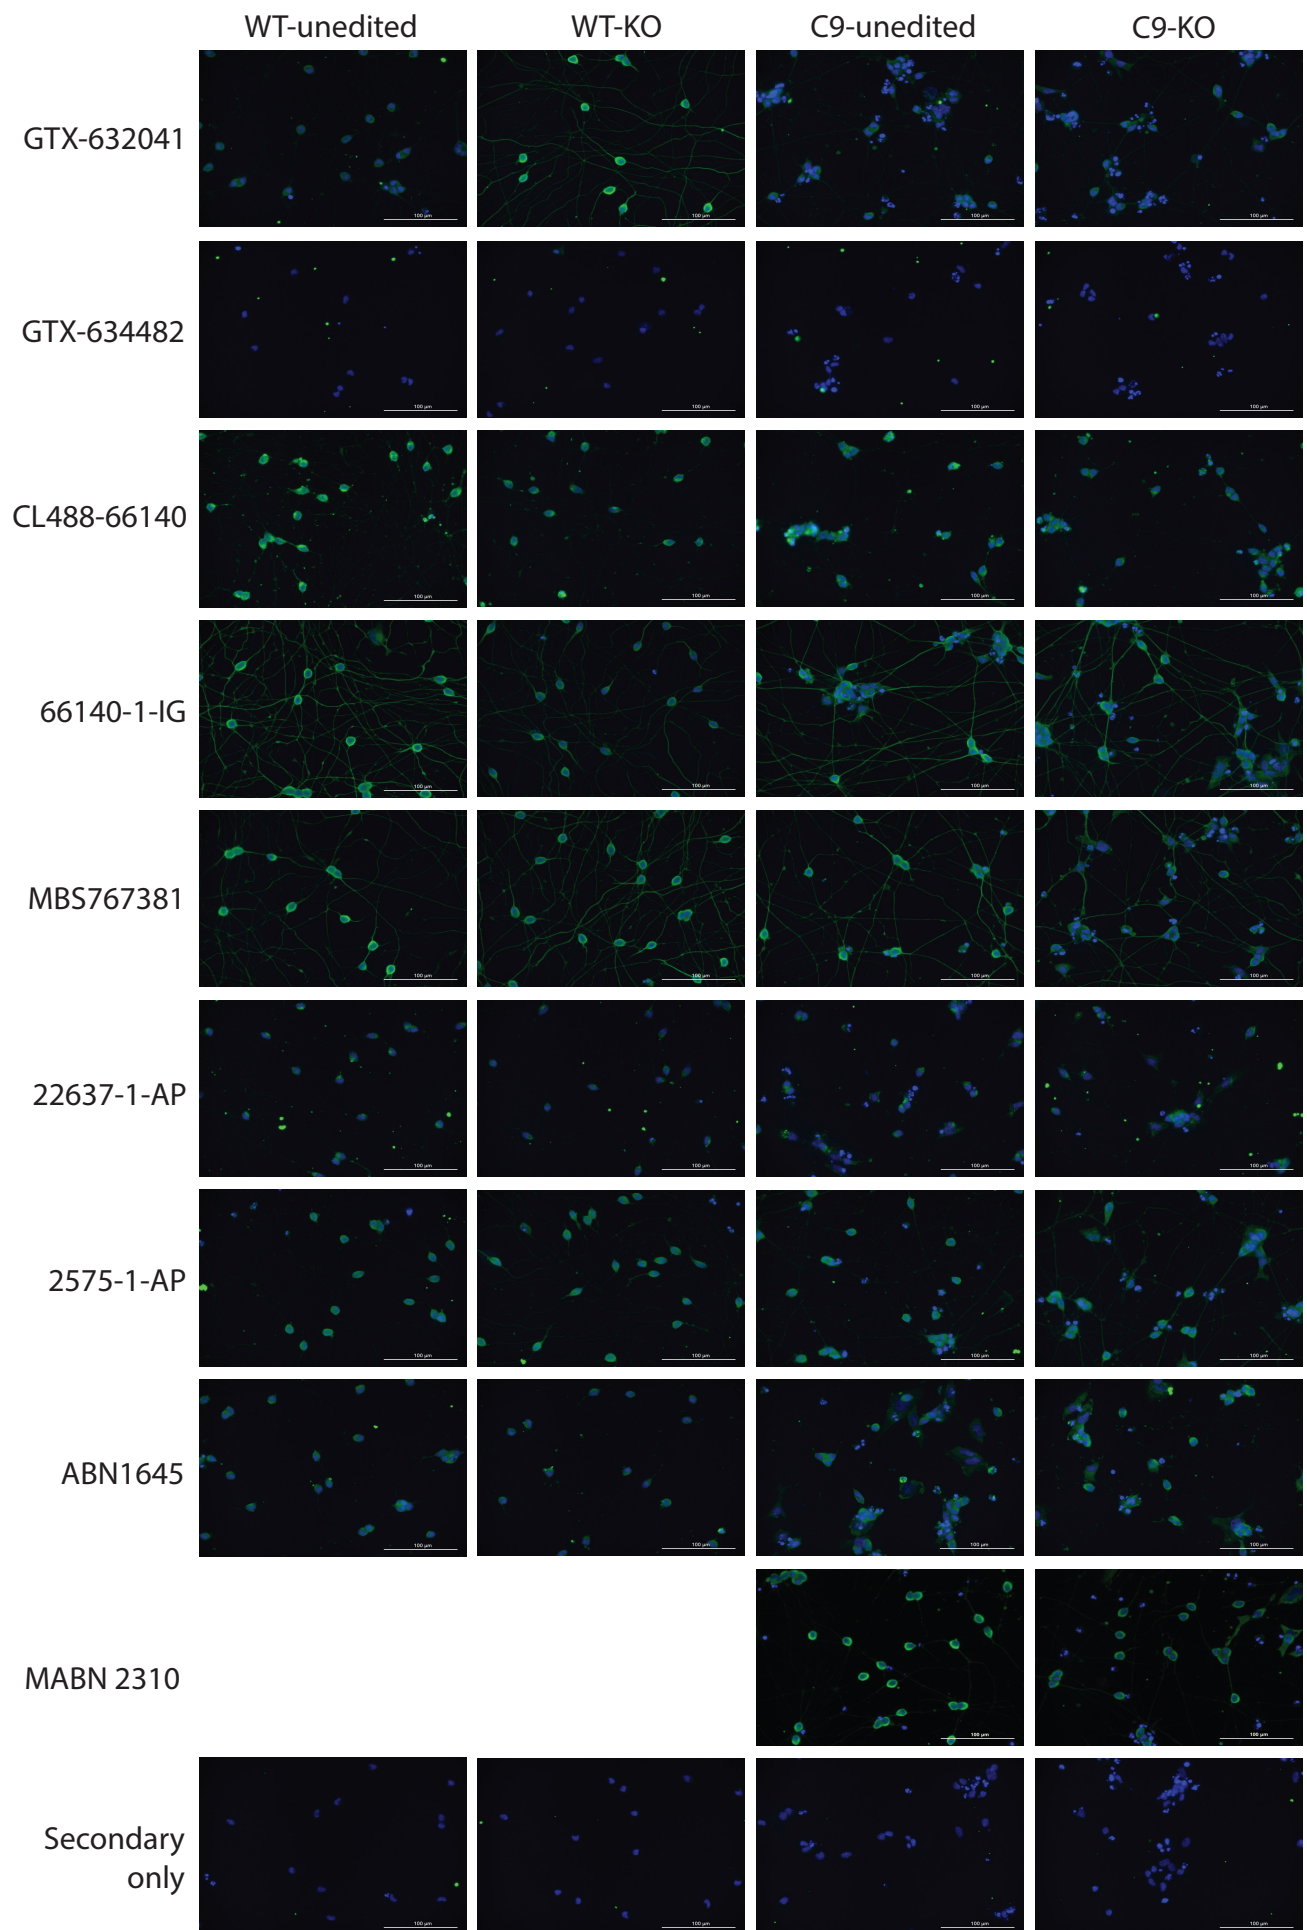

**Supplemental Figure 2. Nine commercial C9orf72 antibodies were not specific for C9orf72 in iPSC-derived motor neurons by immunocytochemistry.** Commercially available C9orf72 antibodies were not specific for C9orf72, as shown by comparing staining patterns in knock-out lines (WT-KO and C9-KO) to unedited cells (WT-unedited and C9-unedited). Blue = DAPI. Green = staining with antibodies listed in Table 2. Scale bar = 100  $\mu$ m.

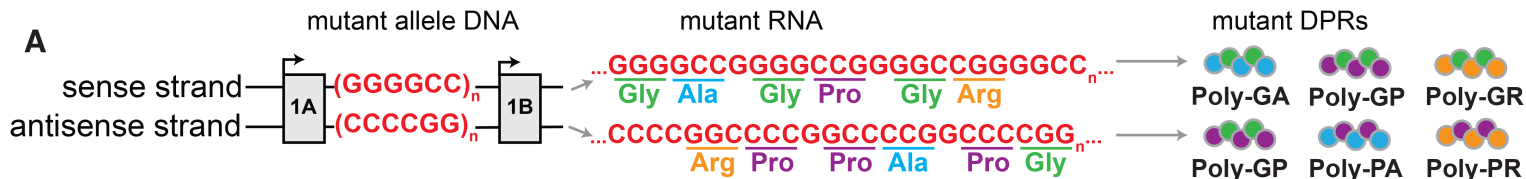

**B**

| DPR       | Capture    | Detect                  | Capture Concentration (µg/mL) | Detect Concentration (µg/mL) | Lysate Concentration (µg) | Plate                   | Blocker                 | Solution                | C9/KO Ratio |      |      |
|-----------|------------|-------------------------|-------------------------------|------------------------------|---------------------------|-------------------------|-------------------------|-------------------------|-------------|------|------|
| Poly - GA | MABN889    | MABN889                 | 1                             | 1                            | 18                        | Small Spot Streptavidin | Blocker A               | PBS                     | 17.4        |      |      |
|           |            |                         |                               | 2                            | 18                        | Small Spot Streptavidin | Blocker A               | PBS                     | 20.4        |      |      |
|           |            |                         | 4                             | 1                            | 18                        | Small Spot Streptavidin | Blocker A               | PBS                     | 16.3        |      |      |
|           |            |                         |                               | 2                            | 18                        | Small Spot Streptavidin | Blocker A               | PBS                     | 14.44       |      |      |
| Poly - GP | 24494-1-AP | 24494-1-AP              | 1                             | 1                            | 9.37                      | Standard                | Blocker A               | PBS                     | 1.3         |      |      |
|           |            |                         |                               |                              | 18.75                     | Standard                | Blocker A               | PBS                     | 1.6         |      |      |
|           |            |                         |                               |                              | 37.5                      | Standard                | Blocker A               | PBS                     | 2           |      |      |
|           |            |                         |                               |                              | 9.37                      | Standard                | Blocker A               | PBS                     | 1.6         |      |      |
|           |            |                         |                               | 2                            | 18.5                      | Small Spot Streptavidin | Blocker A               | PBS                     | 1.27        |      |      |
|           |            |                         |                               |                              |                           | Milk                    | PBS                     | 1.26                    |             |      |      |
|           |            |                         |                               |                              | Standard                  | Milk                    | PBS                     | 1.33                    |             |      |      |
|           |            |                         |                               |                              | 18.75                     | Standard                | Blocker A               | PBS                     | 1.7         |      |      |
|           |            |                         | 25                            | Small Spot Streptavidin      | Blocker A                 | PBS                     | 0.99                    |                         |             |      |      |
|           |            |                         | 37.5                          | Standard                     | Blocker A                 | PBS                     | 1.9                     |                         |             |      |      |
|           |            |                         | 20 (Denatured)                | Small Spot Streptavidin      | Blocker A                 | PBS                     | 1.34                    |                         |             |      |      |
|           |            |                         | TBS                           | 0.85                         |                           |                         |                         |                         |             |      |      |
|           |            |                         | 4                             | 1                            | 9.37                      | Standard                | Blocker A               | PBS                     | 1.4         |      |      |
|           |            |                         |                               |                              | 18.75                     | Standard                | Blocker A               | PBS                     | 1.6         |      |      |
|           |            |                         |                               |                              | 37.5                      | Standard                | Blocker A               | PBS                     | 1.5         |      |      |
|           |            |                         |                               |                              | 9.37                      | Standard                | Blocker A               | PBS                     | 1.2         |      |      |
|           | 2          | 18.75                   |                               | Standard                     | Blocker A                 | PBS                     | 1.3                     |                         |             |      |      |
|           |            | 37.5                    |                               | Standard                     | Blocker A                 | PBS                     | 1.5                     |                         |             |      |      |
|           |            | A-I 0756                |                               | A-I 0756                     | 2                         | 2                       | 18.5                    | Small Spot Streptavidin | Blocker A   | TBS  | 2.4  |
|           |            | A-I 0757                |                               | A-I 0757                     | 2                         | 4                       | 18.5                    | Small Spot Streptavidin | Blocker A   | TBS  | 2.63 |
| A-I 0757  | A-I 0756   | 2                       | 2                             | 18.5                         | Small Spot Streptavidin   | Blocker A               | TBS                     | 2.01                    |             |      |      |
|           | A-I 0757   | 2                       | 4                             | 18.5                         | Small Spot Streptavidin   | Blocker A               | TBS                     | 2.3                     |             |      |      |
| Poly - GR | 23978-1-AP | 23978-1-AP              | 1                             | 1                            | 18.5                      | Small Spot Streptavidin | Blocker A               | PBS                     | 0.94        |      |      |
|           |            |                         |                               | 2                            | 18.5                      | Small Spot Streptavidin | Blocker A               | PBS                     | 0.83        |      |      |
|           |            |                         | 4                             | 1                            | 18.5                      | Small Spot Streptavidin | Blocker A               | PBS                     | 0.91        |      |      |
|           |            |                         |                               | 2                            | 18.5                      | Small Spot Streptavidin | Blocker A               | PBS                     | 1.01        |      |      |
|           | MABN778    | 2.33                    | 2                             | 20                           | Small Spot Streptavidin   | Blocker A               | PBS                     | 0.92                    |             |      |      |
|           | MABN778    | 23978-1-AP              | MABN778                       | 1                            | 1                         | 20 (Denatured)          | Small Spot Streptavidin | Blocker A               | PBS         | 0.77 |      |
|           |            |                         |                               |                              | 2.33                      | 2                       | 20                      | Small Spot Streptavidin | Blocker A   | PBS  | 0.99 |
|           |            |                         |                               | 4                            | 1                         | 18                      | Small Spot Streptavidin | Blocker A               | PBS         | 0.84 |      |
|           |            |                         |                               |                              | 2                         | 18                      | Small Spot Streptavidin | Blocker A               | PBS         | 0.9  |      |
|           |            |                         |                               |                              | 20 (Denatured)            | Small Spot Streptavidin | Blocker A               | PBS                     | 0.77        |      |      |
| 1         |            |                         |                               |                              | 18                        | Small Spot Streptavidin | Blocker A               | PBS                     | 0.95        |      |      |
| 2         | 18         | Small Spot Streptavidin | Blocker A                     | PBS                          | 1                         |                         |                         |                         |             |      |      |
| Poly - PA | ABN1356    | ABN1356                 | 1                             | 1                            | 18.5                      | Small Spot Streptavidin | Blocker A               | PBS                     | 0.86        |      |      |
|           |            |                         |                               | 2                            | 18.5                      | Small Spot Streptavidin | Blocker A               | PBS                     | 0.88        |      |      |
|           |            |                         | 4                             | 1                            | 18.5                      | Small Spot Streptavidin | Blocker A               | PBS                     | 0.9         |      |      |
|           |            |                         |                               | 45                           | Small Spot Streptavidin   | Blocker A               | PBS                     | 0.9                     |             |      |      |
|           | MABN1790   | MABN1790                | MABN1790                      | 1                            | 1                         | 18.5                    | Small Spot Streptavidin | Blocker A               | PBS         | 0.86 |      |
|           |            |                         |                               |                              | 2                         | 18.5                    | Small Spot Streptavidin | Blocker A               | PBS         | 0.98 |      |
|           |            |                         |                               | 4                            | 1                         | 18.5                    | Small Spot Streptavidin | Blocker A               | PBS         | 1.11 |      |
|           |            |                         |                               |                              | 2                         | 18.5                    | Small Spot Streptavidin | Blocker A               | PBS         | 0.99 |      |
| Poly - PR | 23979-1-AP | 23979-1-AP              | 1                             | 1                            | 18.5                      | Small Spot Streptavidin | Blocker A               | PBS                     | 1.03        |      |      |
|           |            |                         |                               | 2                            | 18.5                      | Small Spot Streptavidin | Blocker A               | PBS                     | 0.93        |      |      |
|           |            |                         |                               | 45                           | Small Spot Streptavidin   | Blocker A               | PBS                     | 0.84                    |             |      |      |
|           |            |                         | 4                             | 1                            | 18.5                      | Small Spot Streptavidin | Blocker A               | PBS                     | 0.91        |      |      |
|           |            |                         |                               | 2                            | 18.5                      | Small Spot Streptavidin | Blocker A               | PBS                     | 0.93        |      |      |
|           |            |                         |                               | 45                           | Small Spot Streptavidin   | Blocker A               | PBS                     | 1.03                    |             |      |      |
|           | ABN1354    | ABN1354                 | ABN1354                       | 2.33                         | 2                         | 20                      | Small Spot Streptavidin | Blocker A               | PBS         | 1.07 |      |
|           |            |                         |                               |                              | 2.33                      | 2                       | 20                      | Small Spot Streptavidin | Blocker A   | PBS  | 0.97 |
|           |            |                         |                               | 1                            | 1                         | 18                      | Small Spot Streptavidin | Blocker A               | PBS         | 0.88 |      |
|           |            |                         |                               |                              | 2                         | 18                      | Small Spot Streptavidin | Blocker A               | PBS         | 0.96 |      |
|           |            |                         |                               |                              | 45                        | Small Spot Streptavidin | Blocker A               | PBS                     | 0.95        |      |      |
|           |            |                         |                               |                              | 1                         | 18                      | Small Spot Streptavidin | Blocker A               | PBS         | 1.03 |      |
| 4         | 1          | 18                      | Small Spot Streptavidin       | Blocker A                    | PBS                       | 0.97                    |                         |                         |             |      |      |
|           | 2          | 18                      | Small Spot Streptavidin       | Blocker A                    | PBS                       | 0.97                    |                         |                         |             |      |      |

**Supplemental Figure 3. Two of 10 antibodies tested were specific for dipeptide repeat proteins in *C9orf72* mutant iPSC-derived motor neurons compared to *C9orf72* KO control.**

**(A)** Schematic of sense and antisense RNAs carrying the repeat expansion and their translation through non-canonical repeat-associated non-AUG (RAN) translation. RAN translation is expected to produce 5 different dipeptide repeat proteins (DPRs): poly-GA and poly-GR from the sense strand, poly-PA and poly-PR from the antisense strand and poly-GP from both the sense and antisense strands. **(B)** We tested 10 DPR antibodies under various conditions using MSD immunoassay. Concentrations of capture and detection antibodies and lysate concentrations from 2-week-old iPSC-motor neurons are noted. We compared a C9-ALS/FTD patient line harboring ~200 repeats to an isogenic *C9orf72* KO line. Most antibodies generated signals similar between KO and C9-ALS/FTD patient lines (= signal ratio near 1).

GTX632041  
1:500

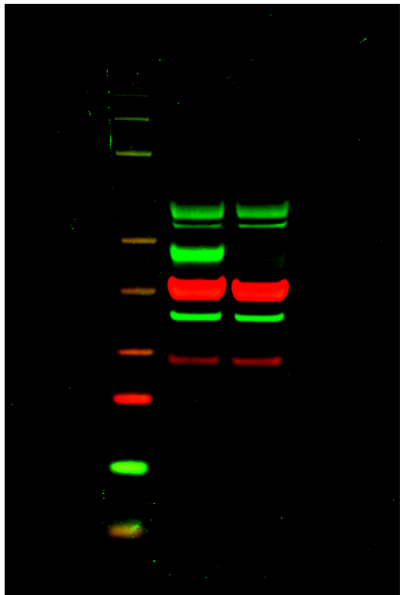

GTX634482  
1:100

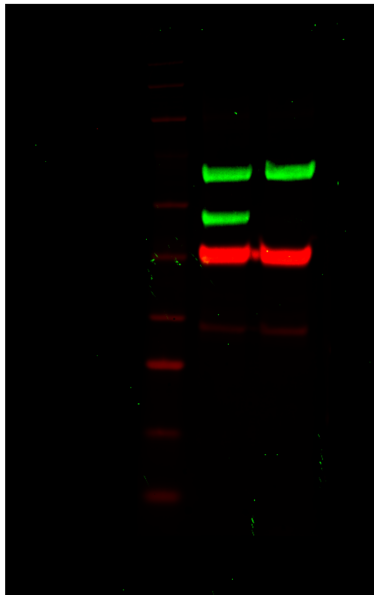

2575-1-AP  
1:300

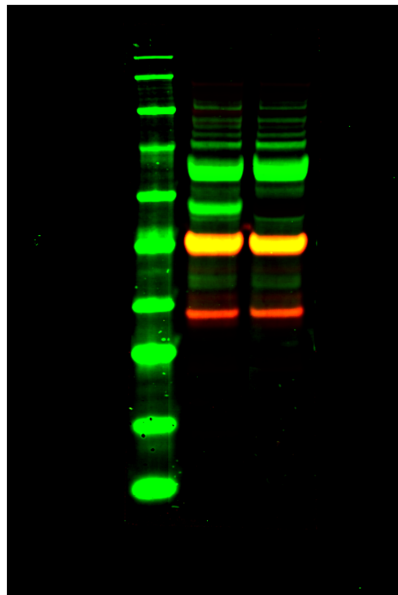

B01-5F2  
1:1000

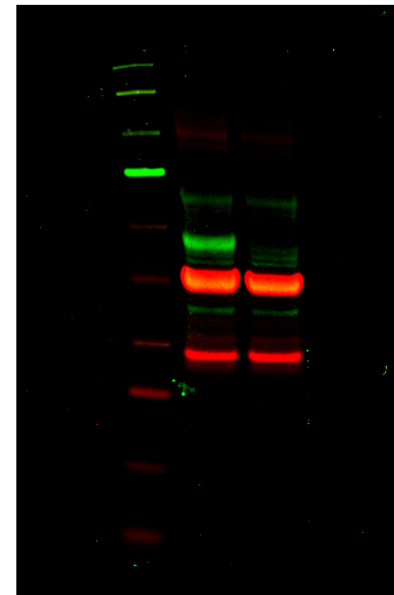

64196  
1:1000

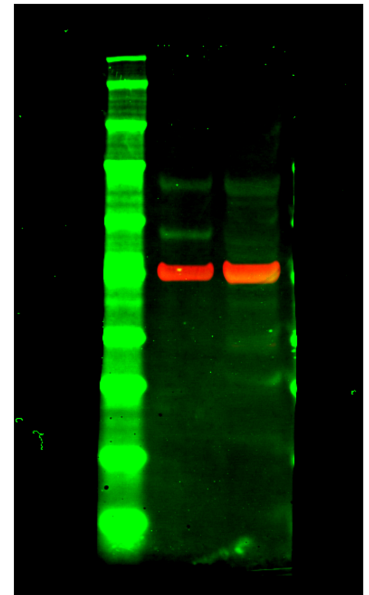

MBS767381  
1:1000

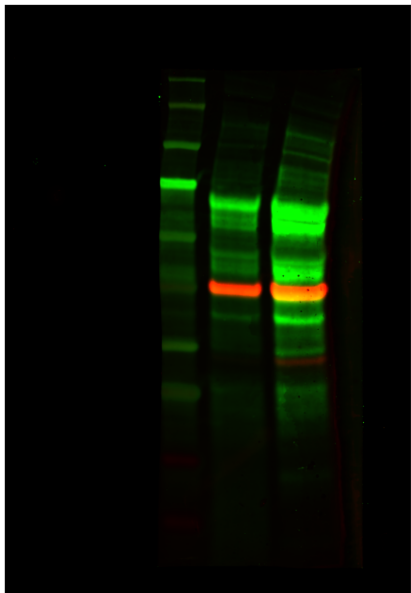

MABN2310  
1:1000

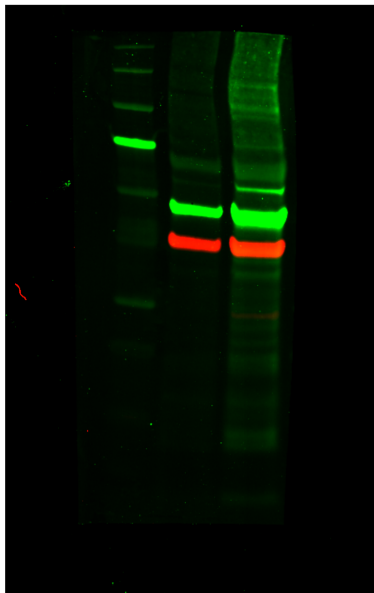

MABN2296  
1:250

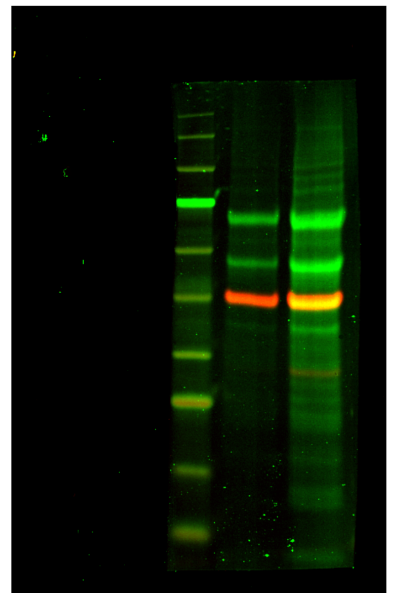

66140-1-IG  
1:500

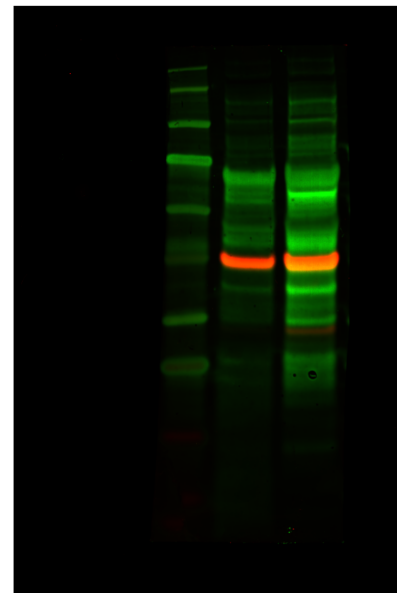

**Supplemental Figure 4. Uncropped Western blot images from Figure 5 (main text).**

| ddPCR Design                   | Probe target                             | Primer sequence or MIQE                                                   | Probe sequence              | Fluorophore |
|--------------------------------|------------------------------------------|---------------------------------------------------------------------------|-----------------------------|-------------|
| 1A-long transcript (variant 3) | Exon 1A-exon 2 junction (NM_001256054.2) | F primer: tgcccgggtgcttcttt<br>R primer: tctggcaacagctggagatg             | GTTTAGGAGATATCTCCGGAGCATT   | FAM         |
| 1B transcript (variant 2)      | Exon 1B-exon 2 junction (NM_018325.4)    | F primer: CGGTGGCGAGTGGATATCTC<br>R primer: TGGCAAAGAGTCGACATCA           | TAATGTGACAGTTGGAATGC        | FAM         |
| Exon 2-3 (total sense mRNA)    | Exon 2-3 junction (total mRNA)           | F primer: acctcccactcatagagtgtgtgt<br>R primer: accctgatcttcattctctgtgc   | AGAATATGGATGCATAAGGAAAGAC   | HEX         |
| UBE2D2 HEX                     | Housekeeping gene (NM_003339, NM_181838) | F primer: ggtctccagcactaactattcaaaa<br>R primer: caggcactaaaggatcatctggat | ttgtccatctgttctctgtgtgatccc | HEX         |
| UBE2D2 FAM                     | Housekeeping gene (NM_003339, NM_181838) | F primer: ggtctccagcactaactattcaaaa<br>R primer: caggcactaaaggatcatctggat | ttgtccatctgttctctgtgtgatccc | FAM         |

**Supplemental Table 1.** ddPCR primers and probes used to generate the data reported in Figure 4 (main text).



| Western blot antibodies  |                       |            |                           |                                         |                             |
|--------------------------|-----------------------|------------|---------------------------|-----------------------------------------|-----------------------------|
| Primary antibody (Cat #) | Manufacturer/Supplier | Target     | Primary antibody dilution | Secondary antibody                      | Secondary antibody dilution |
| GTX632041                | GeneTex               | C9orf72    | 1:100                     | Licor IRDye 800CW<br>Donkey anti-mouse  | 1:1000                      |
| GTX634482                | GeneTex               |            | 1:100                     |                                         |                             |
| MBS767381                | MyBioSource           |            | 1:1000                    |                                         |                             |
| 66140-1-IG               | Proteintech           |            | 1:500                     | Licor IRDye 680RD<br>Donkey anti-rabbit |                             |
| B01-5F2                  | Bio-Rad               |            | 1:1000                    |                                         |                             |
| 25757-1-AP               | Proteintech           |            | 1:300                     | Licor IRDye 800CW<br>Donkey anti-rat    |                             |
| 64196                    | Cell Signaling        |            | 1:1000                    |                                         |                             |
| MABN2310                 | Millipore             |            | 1:1000                    |                                         |                             |
| MABN2296                 | Millipore             |            | 1:250                     | Licor IRDye 800CW<br>Donkey anti-mouse  |                             |
| MAB8929                  | R&D Systems           | Beta-actin | 1:1000                    |                                         |                             |
| NB600-532                | Novus Biologicals     | Beta-actin | 1:1000                    | Licor IRDye 680RD<br>Donkey anti-rabbit |                             |

| Immunocytochemistry antibodies |                       |         |                           |                                               |                             |
|--------------------------------|-----------------------|---------|---------------------------|-----------------------------------------------|-----------------------------|
| Primary antibody (Cat #)       | Manufacturer/Supplier | Target  | Primary antibody dilution | Secondary antibody                            | Secondary antibody dilution |
| GTX632041                      | GeneTex               | C9orf72 | 1:100                     | Goat anti-mouse IgG (H+L)<br>Alexa Fluor 488  | 1:500                       |
| GTX634482                      | GeneTex               |         | 1:100                     |                                               |                             |
| 66140-1-IG                     | Proteintech           |         | 1:500                     |                                               |                             |
| MBS767381                      | MyBioSource           |         | 1:50                      | Goat anti-rabbit IgG (H+L)<br>Alexa Fluor 488 |                             |
| 22637-1-AP                     | Proteintech           |         | 1:500                     |                                               |                             |
| 25757-1-AP                     | Proteintech           |         | 1:300                     |                                               |                             |
| ABN1645                        | Millipore             |         | 1:500                     | Goat anti-rat IgG (H+L)<br>Alexa Fluor 488    |                             |
| MABN2310                       | Millipore             |         | 1:500                     |                                               |                             |
| CL488-66140                    | Proteintech           |         | 1:50                      | NA                                            |                             |

| MSD immunoassay antibodies |                       |         |                           |                             |
|----------------------------|-----------------------|---------|---------------------------|-----------------------------|
| Primary antibody (Cat #)   | Manufacturer/Supplier | Target  | Capture antibody dilution | Detection antibody dilution |
| MABN889                    | Millipore             | Poly-GA | 1 µg/mL                   | 2 µg/mL                     |
| TALS828.179 (lot A-I 0756) | TargetALS             | Poly-GP | 2 µg/mL                   | 4 µg/mL                     |
| TALS828.179 (lot A-I 0757) | TargetALS             | Poly-GP |                           |                             |
| 24494-1-AP                 | Proteintech           | Poly-GP |                           |                             |
| 23978-1-AP                 | Proteintech           | Poly-GR |                           |                             |
| MABN778                    | Millipore             | Poly-GR |                           |                             |
| ABN1356                    | Millipore             | Poly-PA |                           |                             |
| MABN1790                   | Millipore             | Poly-PA |                           |                             |
| 23979-1-AP                 | Proteintech           | Poly-PR |                           |                             |
| ABN1354                    | Millipore             | Poly-PR |                           |                             |

**Supplemental Table 2.** Commercially available antibodies tested in experiments reported in Figures 5-6 (main text) and S2.

| Human tissue                    |              |      |             |           |             |                                                  |
|---------------------------------|--------------|------|-------------|-----------|-------------|--------------------------------------------------|
| Genotype                        | Brain region | Sex  | Age (years) | Diagnosis | PMI (hours) | Provided by                                      |
| <i>C9orf72</i> repeat expansion | Cerebellum   | Male | 70          | ALS       | 6           | John Ravits, University of California, San Diego |
| No <i>C9orf72</i> mutation      | Cerebellum   | Male | 75          | None      | 8           | Brent Harris, Georgetown University              |

  

| Mouse tissue                             |              |        |             |             |            |                                            |
|------------------------------------------|--------------|--------|-------------|-------------|------------|--------------------------------------------|
| Genotype                                 | Brain region | Sex    | Age (weeks) | Jax Labs ID | Background | Collected by                               |
| <i>C9orf72</i> 500-repeat BAC transgenic | Striatum     | Female | 22          | JAX 029099  | FVB/NJ     | Victor van Laar, The Ohio State University |
| Wild-type                                | Striatum     | Female | 22          | JAX 029099  | FVB/NJ     | Victor van Laar, The Ohio State University |

**Supplemental Table 3.** Human brain donor and mouse model information for tissues used in assays reported in Figure 6 (main text).

| Sample                   | Poly-GA (MABN889) |                       |                 | Poly-GP (A-I 0756) |                       |                 | Poly-GP (A-I 0757) |                       |                 | Poly-GP (24494-1-AP) |                       |                 | Poly-GR (23978-1-AP) |                       |                 |
|--------------------------|-------------------|-----------------------|-----------------|--------------------|-----------------------|-----------------|--------------------|-----------------------|-----------------|----------------------|-----------------------|-----------------|----------------------|-----------------------|-----------------|
|                          | Signal            | Average of duplicates | Ratio over ctrl | Signal             | Average of duplicates | Ratio over ctrl | Signal             | Average of duplicates | Ratio over ctrl | Signal               | Average of duplicates | Ratio over ctrl | Signal               | Average of duplicates | Ratio over ctrl |
| C9 ALS/FTD cerebellum    | 1325<br>1262      | 1293.5                | 21.4            | 3634<br>3436       | 3535                  | 7.3             | 7483<br>7770       | 7626.5                | 7.6             | 16858<br>16411       | 16634.5               | 1.6             | 2441<br>2386         | 2413.5                | 0.5             |
| Control human cerebellum | 64<br>57          | 60.5                  |                 | 484<br>483         | 483.5                 |                 | 1026<br>978        | 1002                  |                 | 11784<br>9441        | 10612.5               |                 | 5452<br>5250         | 5351                  |                 |
| C9 BAC mouse striatum    | 344<br>391        | 367.5                 | 8.1             | 308<br>328         | 318                   | 1.9             | 757<br>721         | 739                   | 1.8             | 12478<br>10610       | 11544                 | 1.0             | 3592<br>1505         | 2548.5                | 0.9             |
| Wild-type mouse striatum | 46<br>45          | 45.5                  |                 | 165<br>164         | 164.5                 |                 | 413<br>425         | 419                   |                 | 11033<br>11836       | 11434.5               |                 | 2996<br>2928         | 2962                  |                 |
| C9 ALS/FTD iPSC-MNs      | 186<br>187        | 186.5                 | 3.1             | 206<br>201         | 203.5                 | 1.6             | 505<br>499         | 502                   | 1.8             | 14785<br>12860       | 13822.5               | 1.1             | 3930<br>4087         | 4008.5                | 0.8             |
| C9orf72 KO iPSC-MNs      | 62<br>60          | 61                    |                 | 121<br>127         | 124                   |                 | 286<br>287         | 286.5                 |                 | 12835<br>13418       | 13126.5               |                 | 4967<br>4677         | 4822                  |                 |

| Sample                   | Poly-GR (MABN778) |                       |                 | Poly-PA (ABN1356) |                       |                 | Poly-PA (MABN1790) |                       |                 | Poly-PR (23979-1-AP) |                       |                 | Poly-PR (ABN1354) |                       |                 |
|--------------------------|-------------------|-----------------------|-----------------|-------------------|-----------------------|-----------------|--------------------|-----------------------|-----------------|----------------------|-----------------------|-----------------|-------------------|-----------------------|-----------------|
|                          | Signal            | Average of duplicates | Ratio over ctrl | Signal            | Average of duplicates | Ratio over ctrl | Signal             | Average of duplicates | Ratio over ctrl | Signal               | Average of duplicates | Ratio over ctrl | Signal            | Average of duplicates | Ratio over ctrl |
| C9 ALS/FTD cerebellum    | 68<br>75          | 71.5                  | 1.0             | 196<br>185        | 190.5                 | 1.1             | 1603<br>1712       | 1657.5                | 0.5             | 11326<br>11899       | 11612.5               | 1.0             | 574<br>551        | 562.5                 | 1.1             |
| Control human cerebellum | 70<br>68          | 69                    |                 | 169<br>168        | 168.5                 |                 | 3010<br>3019       | 3014.5                |                 | 11637<br>10781       | 11209                 |                 | 506<br>532        | 519                   |                 |
| C9 BAC mouse striatum    | 71<br>75          | 73                    | 1.1             | 220<br>217        | 218.5                 | 1.2             | 6087<br>6046       | 6066.5                | 0.8             | 12027<br>11913       | 11970                 | 1.0             | 1525<br>1516      | 1520.5                | 2.4             |
| Wild-type mouse striatum | 64<br>69          | 66.5                  |                 | 180<br>187        | 183.5                 |                 | 6981<br>7765       | 7373                  |                 | 12112<br>12248       | 12180                 |                 | 641<br>626        | 633.5                 |                 |
| C9 ALS/FTD iPSC-MNs      | 61<br>71          | 66                    | 0.9             | 217<br>208        | 212.5                 | 1.1             | 953<br>958         | 955.5                 | 0.4             | 12375<br>11941       | 12158                 | 0.9             | 691<br>827        | 759                   | 1.0             |
| C9orf72 KO iPSC-MNs      | 73<br>73          | 73                    |                 | 186<br>193        | 189.5                 |                 | 2186<br>2225       | 2205.5                |                 | 13227<br>12717       | 12972                 |                 | 822<br>693        | 757.5                 |                 |

**Supplemental Table 4.** Electrochemiluminescence signals from 10 commercial dipeptide repeat protein antibodies tested in three sample types on MSD immunoassay.

| Edit Name                 | Edit                                                                                             | Excision Size                        | spCas9 gRNA                                              |                                                             | Excision Primers              |                                   |                                                                      | 5' Cut Site Primers          |                              |                                           | 3' Cut Site Primers               |                                       |                                           |
|---------------------------|--------------------------------------------------------------------------------------------------|--------------------------------------|----------------------------------------------------------|-------------------------------------------------------------|-------------------------------|-----------------------------------|----------------------------------------------------------------------|------------------------------|------------------------------|-------------------------------------------|-----------------------------------|---------------------------------------|-------------------------------------------|
|                           |                                                                                                  |                                      | 5' gRNA                                                  | 3' gRNA                                                     | F primer                      | R primer                          | Expected excision band amplicon length (bp)                          | F primer                     | R primer                     | Expected 5' cut site amplicon length (bp) | F primer                          | R primer                              | Expected 3' cut site amplicon length (bp) |
| Repeat expansion excision | repeat expansion excision                                                                        | 7 NT if no RE, 607 NT if 200 repeats | AACTCAGGAGTC<br>GC GCGCTA                                | ggcccgcccccagc<br>acgcc                                     | CCGCTAGGAAAGA<br>GAGGTGCG     | GAGGAGAGCCCC<br>CGCTTCTAC         | 505 (unedited WT allele), unedited RE will not amplify, 480 (edited) | N/A                          | N/A                          | N/A                                       | N/A                               | N/A                                   | N/A                                       |
| 1Ax                       | exon 1A excision                                                                                 | 227bp                                | TGCGATGACGTT<br>TTCTCAGC                                 | TACTGTGAGAG<br>CAAGTAGTG                                    | GATCCAGCAG<br>CCTCCCCTAT      | GCTACAGGCT<br>GCGGTTGTTT          | 440 (unedited), 214 (edited)                                         | TCCAGCA<br>GCCTCCC<br>CTATT  | TTTACGTG<br>GGCGGAA<br>CTTGT | 216                                       | AGAGAGGTG<br>CGTCAAACA<br>GC      | CTCCTGAG<br>TTCCAGAG<br>CTTGC         | 282                                       |
| 1Bx                       | exon 1B excision                                                                                 | 124bo                                | CGTGGTCGGGGC<br>GGGCCCGG                                 | GCTGTTGGGT<br>TCGGCTGC                                      | TACTCGCTGA<br>GGGTGAACAA<br>G | CAGTCGCTAG<br>AGGCGAAAGC          | 390 (unedited), 266 (edited)                                         | N/A                          | N/A                          | N/A                                       | GTGGCTGTTT<br>GGGGTTCGG           | CCAGTCGC<br>TAGAGCGC<br>AAAG          | 137                                       |
| KO (WT line)              | Excision from 5' to exon 1A through exon 2                                                       | 7,205bp                              | TGTGCGAACCTT<br>AATAGGGG                                 | AATGGGATCG<br>CAGCACATA                                     | GCAGACCAAA<br>AGACGCAAGG      | ACCAGAAAAT<br>AAGCTTTCAA<br>CAGAT | Unedited will not amplify (7748), 578 (edited)                       | GCAGACC<br>AAAAGAC<br>GCAAGG | CAGCGAG<br>TACTGTGA<br>GAGCA | 751                                       | GGGTTAGGG<br>GCCAAATCT<br>CC      | ACCAGAA<br>AATAAGCT<br>TTCAACAG<br>AT | 932                                       |
| KO (patient line)         | Excision from 5' to exon 1A to exon 3-4 intron (using all 4 allele specific gRNAs in 1 reaction) | 21kb                                 | CTCTGTGAGAAG<br>TTTTTATC and<br>CTCTGTGAGAAG<br>TTCITATC | GACTTAGAAGA<br>AATATTGTG<br>and<br>GACTTAAAAGA<br>AATATTGTG | AGGAACCAAG<br>CAGCCATGAA      | GGGAAGCCAC<br>ACCCTTGTA           | Unedited will not amplify (21436), 392 (edited)                      | CTTTGGCA<br>CAGATAG<br>GCCAC | GGCAGGG<br>TGACTGCT<br>TTAAC | 199                                       | TGCCCAGAA<br>TAAATTTTGG<br>ATAACT | GGGAAGC<br>CACACCCT<br>TGTA           | 337                                       |

**Supplemental Table 5. Guide RNAs and primers used to generate and verify, respectively, each edited cell line.** We used spCas9 with a protospacer adjacent motif (PAM) of NGG (not included in the gRNA sequence). Excision size is provided for each type of excision in the WT line. Expected amplicon size for each set of PCR primers is also provided.
